# Supplementary material
Source: PubMed Central journal article supplement (PMC423201)
Supplement: plntcell_16_5_1077__1.pdf [file plntcell_16_5_1077__1.pdf]

Ft -2188 aaa-----  
 Fb -2016 -----  
 Fpa -2051 -----  
 Fv -2958 -----  
 Fc -2405 tctgaaacta ttagactggt agcgtataata ataaattatt tgactgaatt ataatttccg ttaaaccgta gagactacaa gtgtaattta ctctaaaagt  
 Fp -2781 -----

Ft -2185 -----gGC  
 Fb -2016 -----  
 Fpa -2051 -----  
 Fv -2958 -----  
 Fc -2305 aaattaaatt caaacttgta ttcgaattaa actgctacta ttttactgct attaataata tttaataatt taaagtgttg tttcaaaagt aactatatGC  
 Fp -2781 -----

**DR**

Ft -2182 TTATGTTTGT TGGTAGTTTT TCTTTTTGCA TTgtatatga ta----TCTA GAACATGAAA AAagGACTCA CCAGGACAGG AGTATtgcac ctatGTTTTT  
 Fb -2016 -----  
 Fpa -2051 -----  
 Fv -2958 -----  
 Fc -2205 TTATGTTTGT TGATATTTTT TTCTTTTGT TTTGTTATTG TTTACGTCTA GAACATGAAA AA--GACACA CCAGGACACA AGCATCTGA- ----GTTTTT  
 Fp -2781 ----- TTCTTTTGT TTTGTTATTG TTTACGTCTA GAACATGAAA AA--GACACA CCAGGACACA AGCATCTGA- ----GTTTTT

Ft -2086 ATTCGAATAT TTCTCGTTAC ACAATAGAAA AacAAAACAA ATCCACGGAA AGGATAATGA GCTTATACGT GGAcAATATT GAGACTATAT TTCTATGGTT  
 Fb -2016 -----  
 Fpa -2051 -----  
 Fv -2958 -----  
 Fc -2112 ATTCGAATAT TTCTCTTTAC TCAATAGAAA AGTAAAACAA ATCCATGAAA AGGATAATTA ACTTATATGT GGACCATATT GAGACTATAT TTTTGTGGTT  
 Fp -2708 ATTCGAATAT TTCTCTTTAC TCAATAGAAA AGTAAAACAA ATCCATGAAA AGGATAATTA ACTTATATGT GGgCCATATT GAGACTATAT TTTTGTGGTT

**MEM-1**

Ft -1986 AAATCATGTG AATTTAT-G-  
 Fb -2016 --ATCATGTG AATTTAT-G- AAAAAATTAA ATTGGAAAGA GGAAATCAAA AACAAAATTG GATCTTTCAT ATCACGAAAA GGCAGGAGTT  
 Fpa -2051 --ATCATGTG AATTTATTGC AAA-CTTGTG AAAAAATTAG ATTGGAAAGA GGAAATCAAA AACAAAATTG GATCTTTCAT ATCACGAAAA GGCAGGAGTT  
 Fv -2958 --ATCATGTG AATTTAT-GA AAAA-CTTGTG AAAAAATTAA ATTGGAAAGA GGAAATCAAA AACAAAATTG GATCTTTCAT ATCACGAAAA GGCAGGAGTT  
 Fc -2012 AAATCATATG AATTTAT-GA AAAA-CTTGTG AAGAGATTGA ATTGGAAAGA GGAAATAGAA AGCAAAGTTG GATCTTTCAT ATCACGAAAA GGCATGAGTT  
 Fp -2608 AAATCATATG AATTTAT-GA AAAA-CTTGTG AAGAGATTGA ATTGGAAAGA GGAAATAGAA AGCAAAGTTG GATCTTTCAT ATCACGAAAA GGCATGAGTT  
 \*\*\*\*\* \* \*\*\*\*\* \*

Ft -1968 -----AGA GCTGTACTTA CTCACTAAAA CAAACAA-  
 Fb -1930 CTTGCCACTT GACCAAGGAG TGTTTCGTAGA GCCGTACTTA CTCACTAAAA CAAACAAAA ACAAAACAAAC AAAAACTGA AACAAACAAA TTCTCCAT-  
 Fpa -1954 CTTGCCACTT GACCAAGGAG TGTTTCGTAGA GCCGTACTTA TTCACTAAAA CAAACAAAA ACAAAACAAAC AAAAACTGA AACAAACAAA TTCTCCAT-  
 Fv -2862 CTTGCCACTT GACCAAGGAG TGTTTCGTAGA GCCGTACTTA CTCACTAAAA CAAACAAAA ACAAA--AAC AAAAACTGA AACAAACAAA TTCTCCAT-  
 Fc -1913 CTTGCCACTT GACCAAGGAG TGTTTCGTAGA GCCGTACTTA CT----AAAA CAAACAA- -AAAA-CTAA AACAAACAAA ATCTTCCAT-  
 Fp -2509 CTTGCCACTT GACCAAGGAG TGTTTCGTAGA GCCGTACTTA CT----AAAA CAAACAA- -AAAA-CTAA AACAAACATA ATCTTCCAT-  
 \*\*\* \*\* \*\*\*\*\* \* \* \*\*\*\*\* \*\*\*\*\* \* \*\*\*\*\* \* \* \*\*\*\*\* \*



|     |       |            |            |            |            |            |            |            |            |            |            |
|-----|-------|------------|------------|------------|------------|------------|------------|------------|------------|------------|------------|
| Ft  | -1658 | -----      | -----      | -----      | -----      | -----      | -----      | -----      | -----      | -----      |            |
| Fb  | -1723 | -----      | -----      | -----      | -----      | -----      | -----      | -----      | -----      | -----      |            |
| Fpa | -1747 | -----      | -----      | -----      | -----      | -----      | -----      | -----      | -----      | -----      |            |
| Fv  | -2314 | aaaaacataa | aactactgaa | ctacaactac | tgaaactata | actactgaaa | agtaaattac | aagtactgaa | aggaaaccat | cacaactact | gaagttgata |
| Fc  | -1723 | -----      | -----      | -----      | -----      | -----      | -----      | -----      | -----      | -----      |            |
| Fp  | -2321 | -----      | -----      | -----      | -----      | -----      | -----      | -----      | -----      | -----      |            |

|     |       |            |            |            |            |            |            |            |            |            |            |
|-----|-------|------------|------------|------------|------------|------------|------------|------------|------------|------------|------------|
| Ft  | -1658 | -----      | -----      | -----      | -----      | -----      | -----      | -----      | -----      | -----      |            |
| Fb  | -1723 | -----      | -----      | -----      | -----      | -----      | -----      | -----      | -----      | -----      |            |
| Fpa | -1747 | -----      | -----      | -----      | -----      | -----      | -----      | -----      | -----      | -----      |            |
| Fv  | -2214 | acttcagctg | ttgcgacaac | tactgaagtt | gataacttca | gctgttgtga | caactactga | agttgataac | ttcagctggt | gtgacaacta | ctgatcactt |
| Fc  | -1723 | -----      | -----      | -----      | -----      | -----      | -----      | -----      | -----      | -----      |            |
| Fp  | -2321 | -----      | -----      | -----      | -----      | -----      | -----      | -----      | -----      | -----      |            |

|     |       |            |            |            |            |            |            |            |            |            |            |
|-----|-------|------------|------------|------------|------------|------------|------------|------------|------------|------------|------------|
| Ft  | -1658 | -----      | -----      | -----      | -----      | -----      | -----      | -----      | -----      | -----      |            |
| Fb  | -1723 | -----      | -----      | -----      | -----      | -----      | -----      | -----      | -----      | -----      |            |
| Fpa | -1747 | -----      | -----      | -----      | -----      | -----      | -----      | -----      | -----      | -----      |            |
| Fv  | -2114 | tggtcttcag | tctttgtctt | tagtctttgt | tcttcagact | tttactttca | gactttgtct | tcagctgata | gcttcagact | ttgtcttcag | ttctttactt |
| Fc  | -1723 | -----      | -----      | -----      | -----      | -----      | -----      | -----      | -----      | -----      |            |
| Fp  | -2321 | -----      | -----      | -----      | -----      | -----      | -----      | -----      | -----      | -----      |            |

|     |       |            |            |            |            |            |            |            |            |            |            |
|-----|-------|------------|------------|------------|------------|------------|------------|------------|------------|------------|------------|
| Ft  | -1658 | -----      | -----      | -----      | -----      | -----      | -----      | -----      | -----      | -----      |            |
| Fb  | -1723 | -----      | -----      | -----      | -----      | -----      | -----      | -----      | -----      | -----      |            |
| Fpa | -1747 | -----      | -----      | -----      | -----      | -----      | -----      | -----      | -----      | -----      |            |
| Fv  | -2014 | tcagactttg | tcttcagctg | atagcttcag | accttgtctt | cagttcttta | cttttagact | ttgtctttag | tagaagtctt | cagttcttgt | cttcagactt |
| Fc  | -1723 | -----      | -----      | -----      | -----      | -----      | -----      | -----      | -----      | -----      |            |
| Fp  | -2321 | -----      | -----      | -----      | -----      | -----      | -----      | -----      | -----      | -----      |            |

|     |       |            |            |            |            |            |            |            |            |            |            |
|-----|-------|------------|------------|------------|------------|------------|------------|------------|------------|------------|------------|
| Ft  | -1658 | -----      | -----      | -----      | -----      | -----      | -----      | -----      | -----      | -----      |            |
| Fb  | -1723 | -----      | -----      | -----      | -----      | -----      | -----      | -----      | -----      | -----      |            |
| Fpa | -1747 | -----      | -----      | -----      | -----      | -----      | -----      | -----      | -----      | -----      |            |
| Fv  | -1914 | tgtcttcaga | ccttgtaatc | agctgatggt | ttcagctggt | gtgatcttct | tcagcagttg | caatgtctgt | gggacttaga | ggtttttctg | atcaggctca |
| Fc  | -1723 | -----      | -----      | -----      | -----      | -----      | -----      | -----      | -----      | -----      |            |
| Fp  | -2321 | -----      | -----      | -----      | -----      | -----      | -----      | -----      | -----      | -----      |            |

|     |       |            |            |            |            |            |            |            |            |             |            |
|-----|-------|------------|------------|------------|------------|------------|------------|------------|------------|-------------|------------|
| Ft  | -1658 | -----      | -----      | -----      | TCTCTACATA | GAGGCGTTAA | TGCGTCAATT | TTGTGTGTTA | AAGACATAAT | CTAATACAAC  | ATTGAAGATT |
| Fb  | -1723 | -----      | -----      | ----CTATTC | TCTGTACATA | AAGGCGTTAA | CGGATCAATT | TTGCGTGTTA | AAGACCAAAT | CTGATACAAC  | ATTGAAGATT |
| Fpa | -1747 | -----      | -----      | ----CTATTC | TCTGTACATA | AAGGCGTTAA | CGGATCAATT | TTGCGTGTTA | AAGACCAAAT | CTGATACCAC  | ATTGAAGATT |
| Fv  | -1814 | ttggttcttt | tggtccaaca | aatgCTATTC | TCTGTACATA | AAGGCGTTAA | CGGATCAATT | TTGCaTGTTA | AAGACCAAAT | CTGATACAAC  | ATTGAAGATT |
| Fc  | -1723 | -----      | -----      | ----GTATTC | TCTGTACATA | GAGGTGTTAA | CGGGTCAAAT | TTGCGTGTTA | AAGACCAAAT | CTGATACGAC  | CTTGAAGAAT |
| Fp  | -2321 | -----      | -----      | ----GTATTC | TCTGTACATA | GAGGCGTTAA | CGGGTCAAAT | TTGCGTGTTA | AAGACCAAAT | CTGATACGAC  | CTTGAAGATT |
|     |       |            |            |            | *** *****  | *** *****  | * ***** *  | *** *****  | ***** **   | ** ***** ** | ***** *    |

DR

Ft -1588 TTCTATG--- -----A ATTTGGAAAG TATGTATACA  
 Fb -1647 TTCTATGAAT TTGGAAAGTA TGCATACACA AAAaaATTAT TAAAGACCAA ATCTGATACA ACATTGAAGA TTTTTTATGA ATTTGGAAAG TATGCATACA  
 Fpa -1671 TTCTATGAAT TTGGAACGTA TGCATACACA AAA--ATTAT TAAAGACCAA ATCTGATACG ACATTGAAGA TTTTTTATGA ATTTGGAAAG TATGCATACA  
 Fv -1714 T-CTATGAAT TGGAAA-GTA TGCATACACA AAA--ATTAT TAAAGACCAA ATCTGATACA ACATTGAAGA TTTTTTATGA ATTTGGAAAG TATGCATACA  
 Fc -1647 TTCTATGAAT TTGGAAAGTA TGCATACA-----  
 Fp -2245 TTCTATGAAT TTGGAAAGTA TGCATACAg-----  
 \* \* \* \* \*

Ft -1560 CAAAAATTAT GTAAGAGAT- -----A AAAGACTTGT GTG----- --GAAATCAA ATACCTATAA AATAATTGCA ATTGTTACGA  
 Fb -1547 CAAAAATTAT ATAAGAGATG Taactgaaga -----TT TTTTGTACC AAGAAATCAA ATACCTATAA AATAATTGCA CTTGTTACGA  
 Fpa -1573 CAAAAATTAT GTAAGAGATG TGAACCTGAA GAT-----TT TTTTGTACC AAGAAATCAA ATACCTATAA AATAATTGCA CTTGTTACGA  
 Fv -1618 CAAAAATTAT GTAAGAGATG TGAACCTGAA GAT-----TT TTTTGTACC AAGAAATCAA ATACCTATAA AATAATTGCA CTTGTTACGA  
 Fc -1619 --AAAATTAT GTAAGAGAGG TGAACCTGAA AATGACTTGC GTGTTGATTT TTCTGTACC AAGAAATCAA ATATCTATAA AATAATTGCA CTCGTAatgt  
 Fp -2216 -AAAAATTAT GTAAGAGACG TGAACCTGAA AATGACTTGT GTGTTGATTT TTTTGTACC AAGAAATCAA ATATATATAA AATAATTGCA CTCGTAA---  
 \* \* \* \* \* \* \* \* \* \* \* \* \* \* \* \* \* \* \* \*

Ft -1489 AAGATGATTT GTTTATTTAT GTATTAACCT TTTACATAAA ATACCTACTA AGTTTGATTT TTAAAATAAA ATTACTCTTA AATTTTAg-C AGAATAACCA  
 Fb -1465 AAGATAATTT GTTTATTTAT ATATTAACGT TTTACATAAA ATACCTAGTA AGTTTGATTT TTAAAATAAA ATTACCCCTA AATTTAT-CC AGAATAACCA  
 Fpa -1488 AAGATGATTT GTTTATTTAT ATATTAACGT TTTACATAAA ATACCTAGTA AGTTTGATTT TTAAAATAAA ATTACCCCTA AATTTAT-CC AAAATAACCA  
 Fv -1533 AAGATGATTT GTTTATTTAT ATATTAACGT TTTACATAAA ATACCTGGTA AGTTGGATTT TTAAAATAAA ATTACCCCTA AATTTAT-CC AGAATAACCA  
 Fc -1521 AAGATGGTAC GTTTATTTAT GTGTTAACCT TTTACATAAA cttCCTAATA AGTTTAAAGAT TTAAAATAAA ATAACTCTTA AAATTTAACC AAAATAACCA  
 Fp -2120 --GATAGTTC GTTTATTCAT GTTTAACTT TTTACATAAA ATACCTAATA AGTTTGAGAT TTAAAATAAA ATAACTCTTA AAATTTAATC AGAATAACCA  
 \* \* \* \* \* \* \* \* \* \* \* \* \* \* \* \* \* \* \* \* \* \* \* \* \* \* \* \*

Ft -1390 GGTAAACTCA TAAACACATG GTACTGACTT TACTACTACC CA-TTAGCTA AGTGTGTTT TGATACAACC CTATTTTCGTA TTATGtatAA AACTCACAAA  
 Fb -1366 GGTGAACTCA GAAACACATC ATACTGACTT TACTACTAAC AATTTAGGTA AGTGTGTTT TGATACGACC CTATTTCTTA TTATTT-AAA AATTCACAAA  
 Fpa -1389 GGTGAACTCA GAAACACATC ATACTGACTT TACTACTAAC AATTTAGGTA AGTGTGTTT TGATACGACC CTATTTCTTA TTATTT-AAA AATTCACAAA  
 Fv -1434 GGTGAACTCA AAAACACATC ATACTGACTT TACTACTAAC AATTTAGGTA AATGTGTTT TGATACGACC CTATTTCTTA TTATTT-AAA AATTCACAAA  
 Fc -1421 GATGAACTCA TGAACACATC ATACTAATC TACTACTACC CATTTAGCTA AGCGTGTTT TGATTCGACC CTATGTCGTA TTGTGTCAA AATTCACACA  
 Fp -2022 GGTGAACTCA TGAACACATC GTACTGACTT TACTACTACC CATTTAGCTG AGAGTGTTT TAATTCGACC CTATTTTGTa TTGTGTCAAT AATTCACATA  
 \* \* \* \* \* \* \* \* \* \* \* \* \* \* \* \* \* \* \* \* \* \* \* \* \* \* \* \*

Ft -1291 TCTAGTTGTA TGCATTAGGT GTGAGATAGC CCCAGAAAGT TTTATGAGAG GGTGTGATGT CAAAAAActT TATGATCATA TAGGTTTTGT TTTTTGTTTT  
 Fb -1267 TCTAGTTGTA TGCATTAGGT TTGAGATAGC CCGAGAAAAT TTTATGGGAG GGTGTGATGT CCAGAAA-TT TATGATCATA TAGGTTTTGT TTTTTGTTTT  
 Fpa -1290 TCTAGTTGTA TGCATTAGGT TTGAGATAGC CCGAGAAAAT TTTATGGGAG GGTGTGATGT CCAGAAA-TT TATGATCATA TAGGTTTTCGT TTTTTgtctt  
 Fv -1335 TCTAGTTCTA TGCATTAGGT TTGAGATAGC CCGAGAAAAT TTTATGGGAG GGTGTGATGT CTAGAAActT TATGATCATA TAGGTTTTGT TTTTTGTTTT  
 Fc -1321 TCTAGCTATA TGCATTAGGT GTGAGagaag cctgaAAAAT TTTATGGGAG GTTTTTATAT CCGGAATTTT TATGATCATA TA-----  
 Fp -1922 TCTAGCTATA TGCATTAGGT GTGAGgagcc tcg---AAAT TTTATGGGAG GTTTTTATAT CAAGAATTTT TATGATCATA TA-----  
 \* \* \* \* \* \* \* \* \* \* \* \* \* \* \* \* \* \* \* \* \* \* \* \* \* \* \* \*

Ft -1191 Ttttg----- -----T TTTTTGTTTT TTTTGTTTTT TTTTGTTTTT TTTGTTTTTT TGTTTTGTTT TTTTTGTTT TGTTTTTTTT gttT-----  
 Fb -1168 TGTTTT----- -----T TTTTTGTTTT TATTGGTTTT TTTTGTTTTT TTTGTTTTTgc TTTTTGTTT TTTTTGTTT TGTTTTTTTTg  
 Fpa -1191 g--TTTTTTT TTGTTTTGTT TTTTTGTTTT TATTGTTTTT TATTg----T TTTGTTTTTT TGTTTTGTTT TTTTTGTTT TGTTTTTTTTg ---T-----  
 Fv -1235 TGTTTTGTTT TTTTGTTTTT TTTTTGTTTT TATTGTTTTT TTTg----- TTTTTTTTTT TGTTTTGTTT TGTTTTGTTT TGTTTTGTTT tgttttgttt  
 Fc -1239 -----  
 Fp -1843 -----

Ft -1111 ----- TTT TTGTTTTTTT TGTTTTTTTGG TTTTTGTTTT TCGG----- -----TG TgcGTGTATG  
 Fb -1121 ----- TTTGTTT TGTTTTTTTGG TTTTTGCTTT TCGGtgtatg tgtgtgagTG T--GTGTGTG  
 Fpa -1106 ----- TTT TTGTTTTTTT TGTTTTTTTGG TTTTTgtgtc gta----- -----T--GTGTATG  
 Fv -1141 tgttttgttt tgttttgttt tgttttgttt tgttttggTTT TGTTTTTTT TGTTTTTTTGG -----GTTTT CATT----- -----TG T--GCCTATA  
 Fc -1239 ----- -----GTTTT CATT----- -----TG T--GCCTATA  
 Fp -1843 -----GTTTT CTTT----- -----TG T--ATCTATG

\* \* \*

Ft -1062 AGAGCTAGTG AGGGTACCAC CGA-TAAAAA TGCCACTGAA ATCGATATTG AATATAACGA CCTTTGCAAG AAGAGAATTA AGTATTTATG AGTACATACT  
 Fb -1066 AGAGCTAGTG AGGGTACCAC CGA-TAAAAA TGCCACTAAA ATCGATATTG AATATAACGA CCTTTGCTAG AAGAGAATTA AGTATTTATG AGTACATACT  
 Fpa -1062 AGAGCTAGTG AGGGTACCAC CGA-TAAAAA TGCCACTGAA ATCGATATTG AATATAACGA CCTTTGCTAG AAGAGAATTA AGTATTTATG AGTACATACA  
 Fv -1057 AGAGCTAGTG AGGGTACCAC CGA-TAAAAA TGtCACTGAA ATTGATATTG AATATAACGA CCTTTGCTAG AAGAGAATTA AGTATTTATG AGTACATACT  
 Fc -1220 AGAGCTAGTG AGGTTACGAT AGA-TAAAAA A-CCACTGAA ATCAATaaT GAATATAAGA CCTTTGGTAG AAGAGAATTA AGTATTTATG ACTACATACT  
 Fp -1824 AGAGCTAGTG AGGTTACGAT AGAtTAAAAA A-CCACTGAA ATCAATATTT GAATATAAGA CCTTTGGTAA AAGAGAATTA AGTATTTAct ACTACATACT  
 \*\*\*\*\* \*\* \* \* \* \*\* \* \* \* \* \* \* \* \* \* \* \* \* \* \* \* \* \* \* \* \* \* \*

Ft -963 TTTGAAGGCT TTCTCGTATT TAATCTTTTC CAGGTTTAAA A----- -----ATAT TAATTATATA TTACACCCCA ATG-----  
 Fb -967 TTTGAAGGCT TTCTCGTATT TAATCTTTTC TGGGTTTAAA A----- -----ACAT AAATTATATA TTACACCCCA ATG-----  
 Fpa -963 TTTGAAGGCT TTCTCGTATT TAATCTTTCA TGGGTTTAAA A----- -----ACAT AAATTATATA TTACACCCCTG ATG-----  
 Fv -958 TTTGAAGGCT TTCTCGTATT CAATCTTTTC TGGG--TAAA A----- -----ACAT AAATTATATA TTACACCCCA ATG-----  
 Fc -1122 TTTGAAGGCT TTCTCGTATT TTTCACaGAG AATTACATCG TTGCTAATTT TATTGTATAA TATCccACAT AAATTATATA TATT-----  
 Fp -1725 TTTGAAGGCT TTCTCGTATT TTACACtGAG AATTACATCG TTGCTAACTT TTTTGTATAA TATCttACAT AAATTACTTA TATTttaaata gacatagtaa  
 \*\*\*\*\* \*\* \* \* \* \* \* \* \* \* \* \* \* \* \* \* \* \* \* \* \* \* \* \*

Ft -895 -----  
 Fb -899 -----  
 Fpa -895 -----  
 Fv -892 -----  
 Fc -1038 -----  
 Fp -1625 gaatcattta agcataaagt acaatcaatc aatacataaa gttt gatggc taaatgataa ttttgggtgga ctagagggtt atttctcact tcttctgtct

Ft -895 -----  
 Fb -899 -----  
 Fpa -895 -----  
 Fv -892 -----  
 Fc -1038 -----ATTAATTAT CAACCTCTTT ATTCTTTATg gtttgtactt taagttttac  
 Fp -1525 tcttttctaac attgaattag tattataaatg ttttattatt ttaaatattat aATTAATTTT AAACATATTT TGTTTTTCTa -----

Ft -895 -----CTTTTAAAT CTTTACAAC TAATCCTTAT AAT-----  
 Fb -899 -----ATTCTAAAT TTTTACAAC TAATCCTTGC AAT-----  
 Fpa -895 -----ATTTTAAAT TTCTACAAC TAATCCTTAT AAT-----  
 Fv -892 -----ATTCTAAAT TTTTACAAC TAATCCTTAC AAT-----  
 Fc -989 tgggttgtat tcacttttag gtattttttt aacctcaata cTTTACATC TTTTACAATT TAACCCGTAT AAT-----  
 Fp -1445 -----TTATAAC TTTTAAAAA TAAgtttata taaaattatg aatacgtagt tatgacgttc  
 \* \* \* \* \* \* \* \* \* \*

|      |       |            |            |            |            |            |            |            |            |            |            |
|------|-------|------------|------------|------------|------------|------------|------------|------------|------------|------------|------------|
| Ft-L | -863  | -----      | -----      | -----      | -----      | -----      | -----      | -----      | -----      | -----      | -----      |
| Fb-L | -867  | -----      | -----      | -----      | -----      | -----      | -----      | -----      | -----      | -----      | -----      |
| Fpa  | -863  | -----      | -----      | -----      | -----      | -----      | -----      | -----      | -----      | -----      | -----      |
| Fv-L | -860  | -----      | -----      | -----      | -----      | -----      | -----      | -----      | -----      | -----      | -----      |
| Fc-L | -916  | -----      | -----      | -----      | -----      | -----      | -----      | -----      | -----      | -----      | -----      |
| Fp-L | -1388 | ttatttttat | ctacatttcg | gtataagtta | gtcaaatata | atatttttta | attttttggt | catgatgtaa | taatttttct | aaattcgaat | ataccgttac |

|     |       |            |            |             |             |             |            |             |            |            |            |
|-----|-------|------------|------------|-------------|-------------|-------------|------------|-------------|------------|------------|------------|
| Ft  | -863  | ----TTTTCA | TTTTCAACTT | TGATCCCATA  | TACTTTTTTTA | TATTTTATAAA | -----      | -----       | -----      | -----      | -----      |
| Fb  | -867  | ----TTTTTA | TTTTCAACTT | TGATCCCATA  | TACTTTTTT-A | TATTTTATAAA | -----      | -----       | -----      | -----      | -----      |
| Fpa | -863  | ----TTTTCA | TTTTCAACTT | TGATCCCATA  | TACTTTTTT-A | TATTTTATAAA | -----      | -----       | -----      | -----      | -----      |
| Fv  | -860  | ----TTTTCA | TTTTCAACTT | TGATCCCATA  | TATTTTTTT-A | TATTTTATTA  | -----      | -----       | -----      | -----      | -----      |
| Fc  | -916  | ----TTTTCA | TTTTCAATTT | TGGTCCAATA  | TACTTTTTT-A | TCTTTTACAT  | -----      | -----       | -----      | -----      | -----      |
| Fp  | -1288 | gataTGTTTA | TTTTACCTA  | CGTTTTCAATA | TAAATCTATT  | TAAaataaac  | cgctctcaat | ctgggggctaa | aacctatggg | tcaagtacaa | tgtatttttt |
|     |       | * * * *    | ***** *    | * * * * *   | ** * *      | *           |            |             |            |            |            |

|     |       |            |            |             |            |            |            |            |            |            |            |
|-----|-------|------------|------------|-------------|------------|------------|------------|------------|------------|------------|------------|
| Ft  | -817  | -----      | -----      | -----       | -----      | -----      | -----      | -----      | -----      | -----      | -----      |
| Fb  | -822  | -----      | -----      | -----       | -----      | -----      | -----      | -----      | -----      | -----      | -----      |
| Fpa | -818  | -----      | -----      | -----       | -----      | -----      | -----      | -----      | -----      | -----      | -----      |
| Fv  | -815  | -----      | -----      | -----       | -----      | -----      | -----      | -----      | -----      | -----      | -----      |
| Fc  | -871  | -----      | -----      | -----       | -----      | -----      | -----      | -----      | -----      | -----      | -----      |
| Fp  | -1188 | tacaagtatt | ataaaatttt | attatttttaa | tattataact | aatttcaaac | attttttttt | ctcttataac | ttttaaaaca | taatgttttg | taaaattacg |

|     |       |            |            |             |             |            |            |            |             |            |            |
|-----|-------|------------|------------|-------------|-------------|------------|------------|------------|-------------|------------|------------|
| Ft  | -817  | -----      | -----      | --AATTTTTA  | TCTTACTTTTT | CAGTCTAAAT | TTTACGAGTT | AACAAGCGGC | AACGTGCGCG  | TGTGGCTTCA | ATGTTTC--- |
| Fb  | -822  | -----      | -----      | --AATTTTTA  | TTTTACTTTTT | CACTCTAAAT | TTTACGAGTC | AACACGCGGC | AACGTGCGCG  | TGTGGCTTCA | ATGTTTT--- |
| Fpa | -818  | -----      | -----      | --AATTTTTA  | TTTTACTTTTT | CAGTCTAAAT | TTTACGAGTT | TACACGCGGC | AACGTGCGCA  | TGTGACTTCA | ATGTTTT--- |
| Fv  | -815  | -----      | -----      | --ATTTTTT-  | --TTACTTTTT | TAGTCTAAAT | TTTACGAGTT | AACACGCGGC | AAAtGTGCGCG | TGTGGCTTCA | ATGTTTT--- |
| Fc  | -871  | -----      | -----      | --ATTTTTTCG | TTTTACATTT  | CGGTCTAAAT | TTTACGAGTT | AACACACCGC | AACGTGCGCG  | TGTGGTTTCA | ATGTTTT--- |
| Fp  | -1088 | aatatgtagt | tgtgacttgc | ttATTTTTAT- | --TTACATTT  | CAGTATAAAT | TTTgtatgaa | accaaccggg | gtcaaatata  | atatattttt | aaattttttt |
|     |       |            |            | * * * *     | ***** * *   | * * * * *  | ***        |            |             |            |            |

|     |      |            |             |            |            |            |            |            |             |            |            |
|-----|------|------------|-------------|------------|------------|------------|------------|------------|-------------|------------|------------|
| Ft  | -742 | -----      | -----       | -----      | -----      | --TACGCATA | TTTTTCCA-- | TTTGACGGCC | CCGTCAACAAC | GCACAAGTCA | TAGATAGACC |
| Fb  | -747 | -----      | -----       | -----      | -----      | --TACACATA | TTTTTCCA-- | TTTGATGGCC | CCGTCTCAAC  | GCACGAGTCA | TAAATTGACT |
| Fpa | -743 | -----      | -----       | -----      | -----      | --TACGCATG | TTTTTCCA-- | TTTGATGGCC | CCGTCAACAAC | GCGCGAGTCA | TACACTGACT |
| Fv  | -743 | -----      | -----       | -----      | -----      | --TACACATA | TTTTTCCA-- | TTTGACGGCC | CCATCAACAAC | GCGCGAGTCA | TAGATTGACT |
| Fc  | -796 | -----      | -----       | -----      | -----      | --TATGCATA | TTTTTTCCTG | TTTACGGCC  | CCGTCACAAT  | GCGCGTGTCA | TAGATTGACT |
| Fp  | -991 | acggcgtagt | aatttttctaa | aatttcaaat | atgtcattac | gaTATGCTTA | TTTTACCTA  | TTTTttaata | taaattttat  | ttaaaatcga | tcactcgaac |
|     |      |            |             |            |            | ** * *     | ***** *    | ***        |             |            |            |

|     |      |             |            |            |             |            |            |            |            |            |            |
|-----|------|-------------|------------|------------|-------------|------------|------------|------------|------------|------------|------------|
| Ft  | -686 | TAGC-----   | -----      | -----TA    | TTATTTTTTTT | TAATAATATT | TTACGTTTGT | CATGGGTGAT | T-----     | -----      | -----      |
| Fb  | -691 | TAGCTAT---  | -----      | -----TA    | TTATTTTTTTT | TATTAATATT | TTACGTTTCT | CATGTGTGAT | T-----     | -----      | -----      |
| Fpa | -687 | TAGCTAT---  | -----      | -----TA    | ----TTTTTT  | CATTAATATT | TTACGTTTCT | CATGCGTGAT | T-----     | -----      | -----      |
| Fv  | -687 | TAGCTAT---  | -----      | -----TA    | TTATTTTTc-T | TATTAATATT | TTACATTTTT | CATGCGTGAT | T-----     | -----      | -----      |
| Fc  | -738 | TAGTTA----- | -----      | -----TTA   | -----T      | TTTTAATATT | TTACATTTCA | CGTGCGTGGT | T-----     | -----      | -----      |
| Fp  | -891 | tgtgcgggcta | aaatctatgg | gtcaagtaTA | ATGTATTTTTT | TATTTATTTT | TTACAccaac | gtaaattttt | ctaaattttc | cccaacaacg | tgatgttctc |
|     |      |             |            |            | * *         | * * * *    | *****      |            |            |            |            |

|     |      |            |           |            |           |   |            |             |            |            |            |            |
|-----|------|------------|-----------|------------|-----------|---|------------|-------------|------------|------------|------------|------------|
| Ft  | -639 | -----      | -----     | -----      | -----     | C | AACGTTTTTA | TGCATAATTT  | TCATGTTGAT | TTATTTATTT | TTGTTGTA   | TTATAATGCG |
| Fb  | -641 | -----      | -----     | -----      | -----     | C | AACGTTTTTA | TAAATAATTTG | TCATATTGAT | TTA-TT-TTT | TTGTTGTA   | TTATAATACG |
| Fpa | -641 | -----      | -----     | -----      | -----     | T | AACGTTTTTA | TGCATAATTT  | TCATGTTGAT | TTATTTATTT | TTGTTGTACA | TTATAATGCG |
| Fv  | -638 | -----      | -----     | -----      | -----     | C | AACGTTTTTA | TGCATAATTT  | TCATATTGAT | TTATTT-TTT | TTGTTGTA   | TTATAATACG |
| Fc  | -697 | -----      | -----     | -----      | -----     | C | AACGTTTTTA | cgtctaattt  | ctgttcgg-T | TTATTT-TTT | TCATTGTTTT | TTATAATACG |
| Fp  | -791 | ctaaatttga | ataaccatt | atgacatggt | tatttccac | C | AACGTTTTAA | TAAAAAAATT  | attttaaacc | agccccaca  | tgcgtggccg | aaactcacgg |

**PR**

|     |      |            |            |            |            |             |            |            |            |            |            |            |       |        |
|-----|------|------------|------------|------------|------------|-------------|------------|------------|------------|------------|------------|------------|-------|--------|
| Ft  | -578 | AGTATTTCCG | G-----     | -----      | -----      | -----       | -----      | -----      | -----      | -TGTTAATGA | TGGATGA--- | -----      | ----- | TGTTAA |
| Fb  | -582 | AGTCTTTCCG | G-----     | -----      | -----      | -----       | -----      | -----      | -----      | -TGTTAATGA | TCGATGA--- | -----      | ----- | TGTTAA |
| Fpa | -580 | AGTCTTTCCG | G-----     | -----      | -----      | -----       | -----      | -----      | -----      | -TGTAAATGG | TCGATGA--- | -----      | ----- | TGTTAA |
| Fv  | -578 | AGTCTTTCCG | G-----     | -----      | -----      | -----       | -----      | -----      | -----      | -TGTTAATGA | TCGATGA--- | -----      | ----- | TGTTAA |
| Fc  | -638 | AGTTTTTCCG | G-----     | -----      | -----      | -----       | -----      | -----      | -----      | -TGTTGATAG | TCGTTGAcag | ttgtgtgata | ttag  | TGCTAC |
| Fp  | -691 | atcaaatata | gctttcttca | cactaacgtt | tttatgtttc | gactataaccg | ttgtgacgta | cTGTTTTCTA | CCTACGT--- | ***        | *          | -----      | ----- | TTCTAA |

|     |      |            |            |        |            |            |       |        |             |            |             |            |            |       |
|-----|------|------------|------------|--------|------------|------------|-------|--------|-------------|------------|-------------|------------|------------|-------|
| Ft  | -545 | ATGACATCGT | TTTAA----- | -----  | -----      | -----      | ----- | -----  | -----       | -----      | -----       | -----      | -----      | ----- |
| Fb  | -549 | ATAACATCGT | TTTAA----- | -----  | -----      | -----      | ----- | -----  | -----       | -----      | -----       | -----      | -----      | ----- |
| Fpa | -547 | ATGACATCGT | TTTAA----- | -----  | -----      | -----      | ----- | -----  | -----       | -----      | -----       | -----      | -----      | ----- |
| Fv  | -545 | CTAACATCGT | TTTAA----- | -----  | -----      | -----      | ----- | -----  | -----       | -----      | -----       | -----      | -----      | ----- |
| Fc  | -588 | TTGACATGAT | TTTAA      | tgcccc | cgtcgtaacg | cgggaggct- | ----- | TAAGAC | TAGTTTTCT-T | AATTCACAAA | AGTTCTCAAC  | GAATGATTAG | TTGCGTTTGT | ----- |
| Fp  | -608 | ATAAAATATA | TTTAA      | aaaca  | tgccgctgca | acacgcgaga | aaac  | TACTAG | TTGTTTTCT-T | AATTCACAAA | AATTCCTCAAC | GAATGATTAG | TTGCGTTTGT | ----- |

|     |      |            |            |            |            |       |       |             |             |            |            |            |       |
|-----|------|------------|------------|------------|------------|-------|-------|-------------|-------------|------------|------------|------------|-------|
| Ft  | -476 | TATTCATAG- | GAAAGCGGAC | GAGCATGTCG | TTATAATTAA | ----- | AAAAA | TATCAAAAAGA | GTA AACAAAA | AAGGAAAAAG | ACTAATTATT | TAG----    | ATAA  |
| Fb  | -479 | TATGCATAG- | GAAAGCGGAC | GAACATGTCG | TTATAATTAA | ----- | AAAAA | TATCAAAAAGA | GTA AACAAAA | AAGGAAAAAG | ACTGATTATT | AATATAATAA | ----- |
| Fpa | -479 | TATGCATAG- | GAAAGCAGAC | GAGCATGTCG | TTATTATTAA | ----- | AAAAA | TATCAAAAAGA | GTA AACAAAA | GAGGAAAAAG | ACTAATTATT | AATATAATAA | ----- |
| Fv  | -476 | TATGCATAG- | GAAAGCGGAC | GAGCATGTCG | TTATTATTAA | ----- | AAAAA | TATCAAAAAGA | GTA AACAAAA | GAGGAAAAAG | ACTGATTATT | AAT----    | ATAA  |
| Fc  | -494 | TATGCActgC | GAAAGCGGAC | GTCATGTCG  | TTATTATTAA | ----- | AAAAA | TACT--AAGA  | GTAAAAAATA  | GAAGTAAAAG | ACTGATTATC | AAT----    | TTAA  |
| Fp  | -509 | TATGCAaa-C | GAAAGCGGAC | GATCATGTCG | TTATTATTAA | ttaaa | AAAAA | TACTAAAAGA  | GTAAAAAATA  | GAAGAAAAAG | ACTGATTATC | AAT----    | TTAA  |

|     |      |            |            |            |            |            |            |            |            |            |            |            |       |
|-----|------|------------|------------|------------|------------|------------|------------|------------|------------|------------|------------|------------|-------|
| Ft  | -385 | TAATAATATC | CACAAAAATA | TTCGAATTCT | TCAATCCTGA | GTTTGCTC-- | TGTGGATGAG | TTTCTGTATC | ATTGATACTT | GATACCTGTA | ATTCACACAC | -----      | ----- |
| Fb  | -385 | TAATAATATC | CACAAAAATA | TTCGAATTCT | TCAATCCTGA | GTTTGCTC-- | TGTGGATGAG | CAACTGTATC | GTTGATACTT | GATACCTGTA | ACTCACACAC | -----      | ----- |
| Fpa | -385 | TAATAATATC | CACAAAAATA | TTCGAATGCT | TCAATCCAGA | GTTTGCTC-- | TGTGGATGAG | TTTCTTTATC | GTTGATACTT | GATACCTGTA | ACTCACATAC | -----      | ----- |
| Fv  | -385 | TAATAATATC | CACAAAAATA | TTCGAATGCT | TCAAGCCTAA | GTTTGCTC-- | TGTGGATGAG | TTTCTGTATC | GGTGATACTT | GATACCTGTA | ACTCACACAC | -----      | ----- |
| Fc  | -404 | TAATAATATC | CACAAAAATA | TTCCAATAAT | TCAACCTGA  | GTTTGCTATT | TGTGGATGAG | TTTCTGTATC | GTTGATAC-- | -----      | CTGTA      | ACTCACACAG | ----- |
| Fp  | -413 | TAATAATATC | CACAAAAATA | TTCCAATAAT | TTAACC-TGA | GTTTGCTATT | TGTGGATGAG | TTTCTGTATC | GTTGATAC-- | -----      | CTGTA      | ACTCACACAG | ----- |

→ **Transcription start site**

|     |      |            |            |            |             |             |            |            |            |            |            |       |       |
|-----|------|------------|------------|------------|-------------|-------------|------------|------------|------------|------------|------------|-------|-------|
| Ft  | -287 | CTCATATCTC | ATACTTCATC | TATAAATA-- | -----       | CCCAA       | TTCATTTTGC | TCAAAGTCTC | AACACTGAGC | ATACCCAA-- | -----      | ----- | ----- |
| Fb  | -287 | CTCATATCTC | ATACTTCATC | TATAAATA-- | -----       | CCCAA       | TTCATTTTGC | TCAAAGTCTC | AACACTGAGC | ATACCCAA-- | -----      | ----- | ----- |
| Fpa | -287 | CTCATATCTC | ATACTTCATC | TATAAATG-- | -----       | CCCAA       | TTCATTTTGC | TCAAAGTCTC | AACACTGAGC | ATACCCAA-- | -----      | ----- | ----- |
| Fv  | -287 | CTCATATCTC | ATACTTCATC | TATAAATA-- | -----       | CCCAA       | TTCATTTTGC | TCAAAGTCTC | AACACTGAGC | ATACCCAA-- | -----      | ----- | ----- |
| Fc  | -311 | TTCATAAECT | ATACTTCATC | TATAAATACT | CAATCCCCTAA | TTCAATTTTGT | TTAGAGTCTC | AACAGTGAGC | ATACCAACAT | CTCAATTTCA | TCATCTTCTT | ----- | ----- |
| Fp  | -321 | TTCTTAAECT | ATACTTCATC | TATAAATACT | CAATCCCCAA  | TTCGTTTTTGT | TTAGAGTCTC | AACACTGAGC | ATACCCATAT | CTCAATTTCA | TCATCTTCTT | ----- | ----- |

|     |      |               |            |            |             |            |            |             |            |             |            |
|-----|------|---------------|------------|------------|-------------|------------|------------|-------------|------------|-------------|------------|
| Ft  | -216 |               |            |            |             |            |            |             |            |             |            |
| Fb  | -216 |               |            |            |             |            |            |             |            |             |            |
| Fpa | -216 |               |            |            |             |            |            |             |            |             |            |
| Fv  | -216 |               |            |            |             |            |            |             |            |             |            |
| Fc  | -211 |               |            |            |             |            |            |             |            |             |            |
| Fp  | -221 |               |            |            |             |            |            |             |            |             |            |
|     |      | -----TATTCA   | GGTGATCTAA | TTTAACGTTT | GCATGAGTAT  | TTTCTTAATA | AAATTTATGT | TGGGTTTACA  | GTATCTATTG | GGTGGATTTTC | T-----T    |
|     |      | -----TATTCA   | GGTGATCTAA | TTTAACATTT | GCATGAGTAT  | TTTCTTAATA | AAATTTCTAT | TGGGTTTACA  | GTATCTATTG | GGTGGATTTTC | T-----T    |
|     |      | -----TATTCA   | GGTGATCTAA | TTTAACGTTT | GCATGAGTAT  | TTTCTTAATA | AAATTTATAT | TGGGTTTACG  | ATATCTATTG | GGTGGATTTTC | T-----T    |
|     |      | -----TATTCA   | GGTGATCTAA | TTTAACATTT | GCATGAGTAT  | TTTCTTAATA | AAATTTCTGT | TGGGTTTACA  | GTATCTATTG | GGTGGATTTTC | T-----T    |
|     |      | CCACTATTCA    | GGTGATCTGA | TTGAACATTT | ACATAACTAT  | TTGCTT---- | -AATTTATGT | TGGGTTTACA  | GTATCTATTG | GATGGATTTTC | TTGTACCGTT |
|     |      | CCACTATTCA    | GGTGATCTGA | TTGAACATTT | ACATAACTAT  | TTGCTT---- | -AATTTATGT | TGGGTTTACA  | GTATCTATTG | GATGGATTTTC | TTGTACCGTT |
|     |      | *****         | ***** * *  | ** ** *    | ** * **     | ** ** *    | ***** * *  | *****       | *****      | * ***** *   | *          |
|     |      | <b>Intron</b> |            |            |             |            |            |             |            |             |            |
| Ft  | -128 |               |            |            |             |            |            |             |            |             |            |
| Fb  | -128 |               |            |            |             |            |            |             |            |             |            |
| Fpa | -128 |               |            |            |             |            |            |             |            |             |            |
| Fv  | -128 |               |            |            |             |            |            |             |            |             |            |
| Fc  | -116 |               |            |            |             |            |            |             |            |             |            |
| Fp  | -126 |               |            |            |             |            |            |             |            |             |            |
|     |      | AAACGGATTG    | TGGTTTGATT | AATAAAAAAT | CTTAATGAGA  | AGTTTGTGAT | AATATGCTGA | AATG-----   | ----GGTTGT | TTTTGTGTTA  | ATTTTTCAGG |
|     |      | ATACGGATTG    | TGGTTTCATT | AATAAATAAT | CTTAATCAGA  | AGTTTGTGAT | AATATGCTAA | AATA-----   | ----GGTTGT | TTTTATGTTA  | ATTTTTCAGG |
|     |      | ATACGGATTG    | TGGTTTGATT | AATAAAAAAT | CTTAATCAGA  | AGTTTGTGAT | AATATGCTGA | AGTG-----   | ----GGTTGT | TTTTGTGTTA  | ATTTTTCAGG |
|     |      | TTACGGATTG    | TGGTTTGATT | AATAAAAAAT | CTTAATCAGA  | AGTTTGTGAT | AATATGCTAA | AATG-----   | ----GGTTGT | TTTTGTGTTA  | ATTTTTCAGG |
|     |      | ATATGGTTTG    | TGGTTCGATT | ATGGc----  | CTCGATCAGA  | AGTTTGTGAT | AATCTGCTGA | AATG-----   | ----GGTTGT | TTTTGTGTTA  | ATTTTTCAGG |
|     |      | ATATGGTTTG    | TGGTTCGATT | ATGGg----  | CTCGATCAGA  | AGTTTGTGAT | AATCTGGTGA | AATGgggttgt | ttgtGGTTGT | TTTTGTGTTA  | ATTTTTCAGG |
|     |      | * * *         | ***** * *  | *          | *           | ** ** **   | *****      | *** ** * *  | * *        | *****       | *****      |
|     |      | <b>PR +1</b>  |            |            |             |            |            |             |            |             |            |
| Ft  | -38  |               |            |            |             |            |            |             |            |             |            |
| Fb  | -38  |               |            |            |             |            |            |             |            |             |            |
| Fpa | -38  |               |            |            |             |            |            |             |            |             |            |
| Fv  | -38  |               |            |            |             |            |            |             |            |             |            |
| Fc  | -31  |               |            |            |             |            |            |             |            |             |            |
| Fp  | -31  |               |            |            |             |            |            |             |            |             |            |
|     |      | GTTGGAGGGG    | AATTAAGTAT | TAAGCAAGGG | TGTGAGTAATG |            |            |             |            |             |            |
|     |      | GTTGGAGGGG    | AATTAAGTAT | TAAGCAAGGG | TGTGAGTAATG |            |            |             |            |             |            |
|     |      | GTTGGAGGGG    | AATTAAGTAT | TAAGCAAGGG | TGTGAGTAATG |            |            |             |            |             |            |
|     |      | GTTGGAGGGG    | AATTAAGTAT | TAAGCAAGGG | TGTGAGTCATG |            |            |             |            |             |            |
|     |      | GTTGGAGGGG    | AATTAAG--- | ----CAAGGG | TGTGTGTAATG |            |            |             |            |             |            |
|     |      | GTTGGAGGGG    | AATTAAG--- | ----CAAGTG | TGTGTGTAATG |            |            |             |            |             |            |
|     |      | *****         | *****      | **** *     | **** ** *   |            |            |             |            |             |            |

**Supplemental Figure 1:** Comparison of *ppcA* promoter sequences from *Flaveria trinervia* (Ft), *F. bidentis* (Fb), *F. palmeri* (Fpa), *F. vaginata* (Fv), *F. cronquistii* (Fc) and *F. pringlei* (Fp). The alignment was performed with Dialign (Morgenstern et al, 1998) as provided by Genomatix (<http://www.genomatix.de/cgi-bin/dialign/dialign.pl>) using the default parameters and corrected by hand. Aligned nucleotides are shown in upper case letters. Identical positions in all promoters are marked by an asterisk. The distal region (DR) and the proximal region (PR) of the *F. trinervia* promoter are labelled by grey bars. The MEM-1 in the distal region and the Intron in the proximal region are highlighted by black bars.
